# Supplementary material for: Oncogenic Sox2 regulates and cooperates with VRK1 in cell cycle progression and differentiation
Source: PubMed Central journal article supplement (PMC4917848; doi:10.1038/srep28532), 2016-06-23
Supplement: srep28532-s1.pdf [file srep28532-s1.pdf]

## Supplementary Information

# Oncogenic Sox2 regulates and cooperates with VRK1 in cell cycle progression and differentiation

David S. Moura <sup>1,2</sup>, Isabel F. Fernández <sup>1</sup>, Gema Marín-Royo <sup>1</sup>, Inmaculada López-Sánchez <sup>1</sup>, Elena Martín-Doncel <sup>1,2</sup>, Francisco M. Vega <sup>3,4</sup> and Pedro A. Lazo <sup>1,2</sup>

<sup>1</sup> *Experimental Therapeutics and Translational Oncology Program, Instituto de Biología Molecular y Celular del Cáncer, Consejo Superior de Investigaciones Científicas (CSIC)-Universidad de Salamanca, Campus Miguel de Unamuno, 37007 Salamanca, Spain.*

<sup>2</sup> *Instituto de Investigación Biomédica de Salamanca-IBSAL, Hospital Universitario de Salamanca, 37007 Salamanca, Spain*

<sup>3</sup> *Instituto de Biomedicina de Sevilla (IBIS), CSIC-Universidad de Sevilla-Hospital Universitario Virgen del Rocío, 41013 Sevilla, Spain*

<sup>4</sup> *Departamento de Fisiología Médica y Biofísica, Facultad de Medicina, Universidad de Sevilla, 41013 Sevilla, Spain*

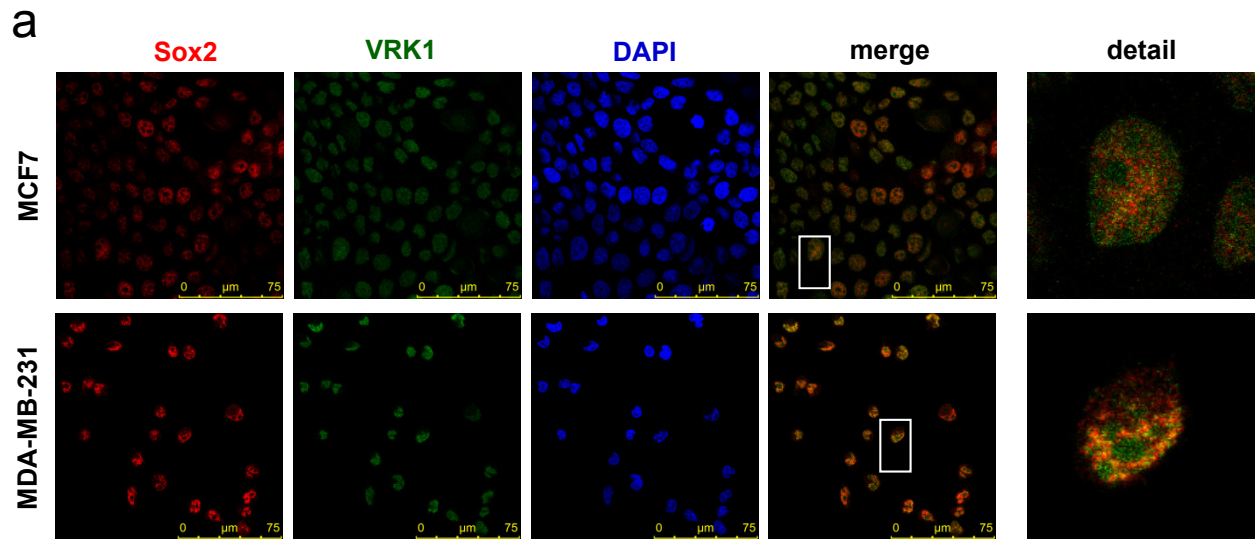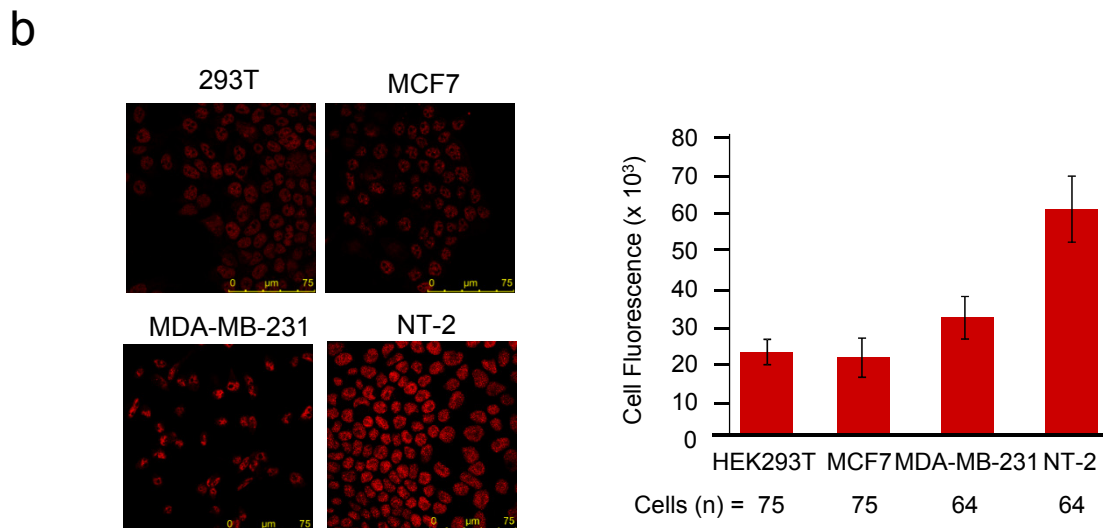

**Supplementary Figure S1. a.** Nuclear colocalization of Sox 2 and VRK1 in nuclei of MCF7 and MDA-MB-231 cells was detected by confocal immunofluorescence microscopy. Sox2 (murine monoclonal antibody) and VRK1 (rabbit polyclonal VC1). **b.** Level of nuclear Sox2 protein in four cell lines cell lines. Nuclear fluorescence was quantified with the image J program. In the graph to the right is shown the relative level in each cell line. The mean and standard deviations are shown.

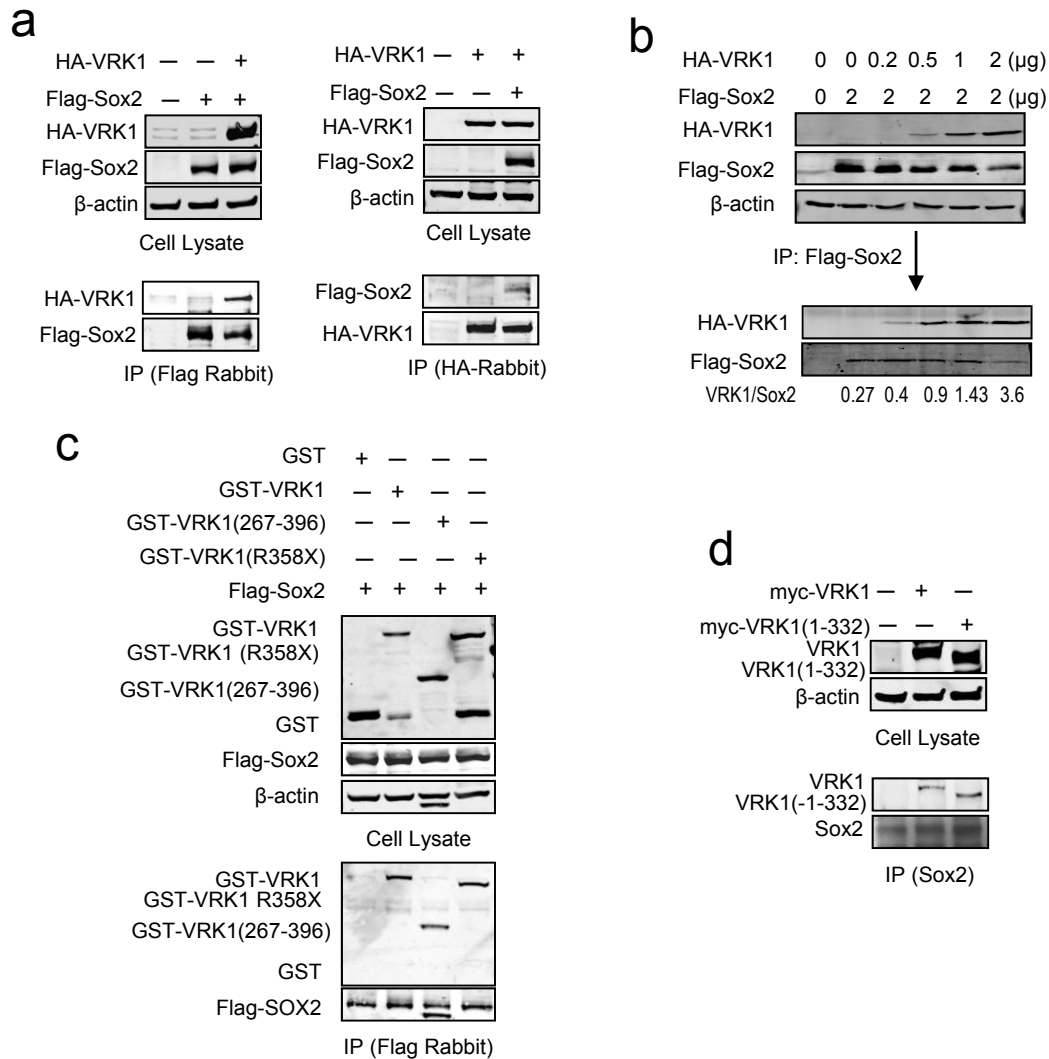

**Supplementary Figure S2. A. Sox2 interacts with VRK1.** **a.** The transfected VRK1 and SOX2 interact one with each other, being the interaction dependent of Sox2 levels. The 293T cells were transfected, with Sox2 (pCMV6-Flag-myc-Sox2), with wild-type VRK1 (pCEFL HA-VRK1). 48 later the cells were lysed and the extracts immunoprecipitated with a rabbit polyclonal anti-Flag (F7425) antibody or with rabbit polyclonal anti-HA (H6908) antibody. The immunoprecipitates were loaded in a 10% acrylamide gel. HA-VRK1 was detected with anti-HA mAb (16B12). Endogenous VRK1 was detected using a anti-VRK1 (1B5) antibody. Flag-tagged Sox2 was detected with anti-Flag murine mAb (F4042) antibody (1:1000). Human  $\beta$ -Actin was detected using a mouse monoclonal anti- $\beta$ -Actin antibody. **b.** Dose dependent interaction between Sox2 and VRK1. The 293T cells were transfected, with Sox2 (pCMV6-Flag-myc-Sox2), with increasing amounts of wild-type VRK1 (pCEFL HA-VRK1). Sox2 was immunoprecipitated and the presence of VRK1 determined as in part a. **c.** The 293T cells were transfected with Sox2 (pCMV6-Flag-myc-Sox2), and different constructions of VRK1 protein: GST-tagged VRK1 (pGEX-GST-VRK1), carboxy terminal GST-VRK1(267-369) and truncated VRK1 (pGEX-GST-VRK1 (R358X)). 48 hours later the cells were lysed and the extracts were immunoprecipitated with a polyclonal anti-flag (F7425) antibody. The immunoprecipitates were loaded in a 10% acrylamide gel. Wild type GST-VRK1, GST-VRK1 carboxy-terminal and GST-VRK1(R358X) were detected using a mouse monoclonal anti-GST (B-14). Human SOX2 was detected using a mouse monoclonal anti-flag (F4042)  $\beta$ -Actin was detected using a mouse monoclonal anti- $\beta$ -Actin antibody. **d.** The 293T cells were transfected with myc-tagged, wild-type VRK1 (pCDNA3.1-VRK1) and amino terminal VRK1 (pCDNA3.1-VRK1(1-332)). 48 hours later the cells were lysed and the extracts were incubated with a mouse monoclonal anti-Sox2 (E-4) antibody overnight. After the immunoprecipitation, the extracts were loaded in a 10% acrylamide gel. Wild-type VRK1 and VRK1 amino terminal were detected using a rabbit polyclonal anti-myc, endogenous Sox2 was detected using a goat polyclonal (Y-17) antibody and human  $\beta$ -Actin was detected using a mouse monoclonal anti- $\beta$ -actin antibody.

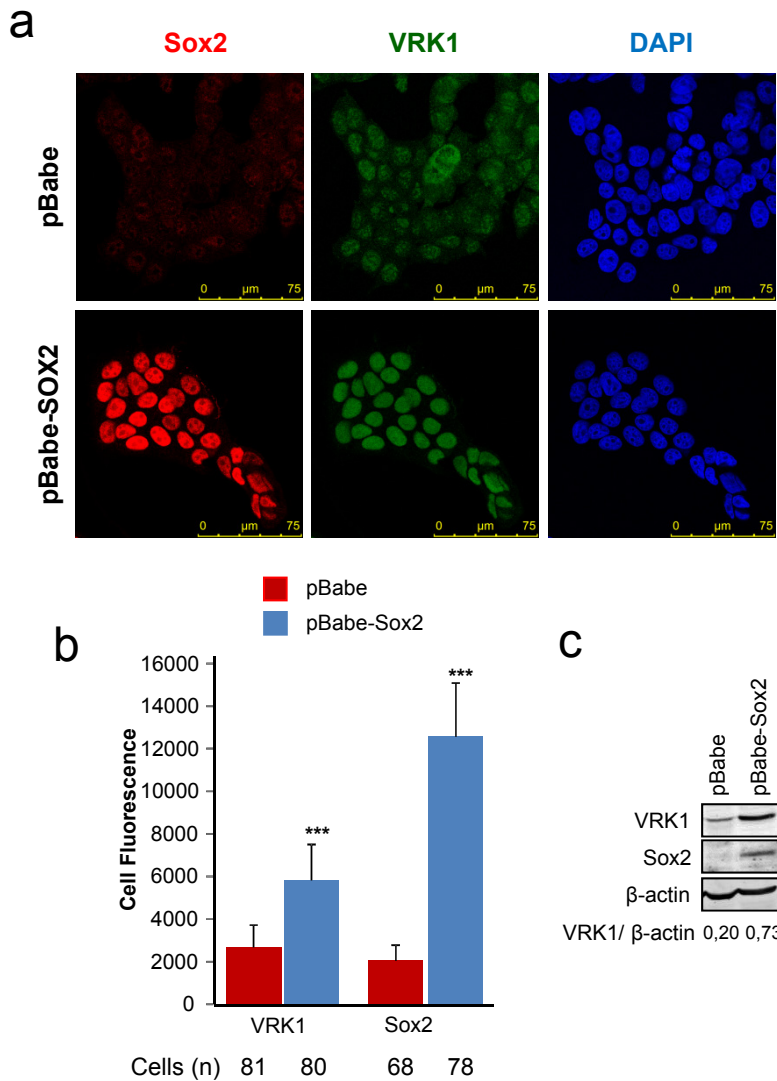

**Supplementary Figure S3. Sox2 activates endogenous *VRK1* gene expression in MCF7 cells.** **a.** Effect of overexpression of Sox2 expressed in breast cancer MCF7 cells that were infected with the retroviral plasmid pBabe-Sox2. Cells were studied by confocal immunofluorescence. The quantification of the fluorescence is shown in the graph to the right. **b.** Fluorescence of nuclear VRK1 protein after infection with empty vector (pBabe) or with pBabe-Sox2. **c.** Effect of Sox2 overexpression in MCF7 cells on endogenous VRK1 protein determined in cell lysates by immunoblot.

**a**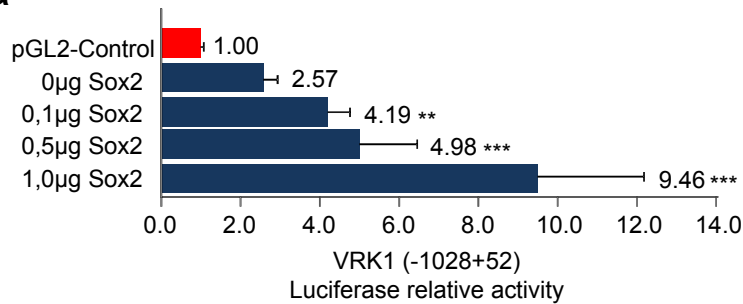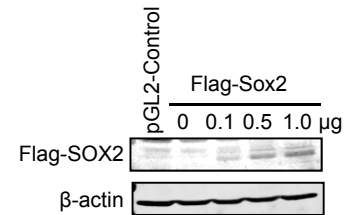**b**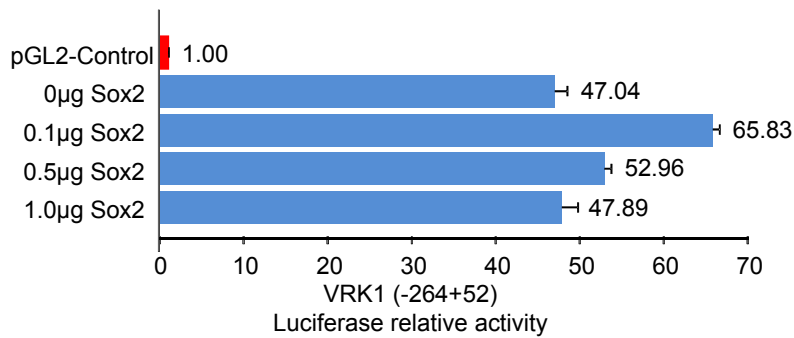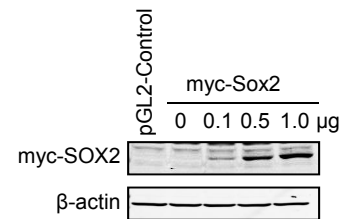

**Supplementary Figure S4. Sox2 activates the human *VRK1* gene promoter. a.** Dose-dependent activation of the *VRK1* gene promoter by expression of Sox2. Two plasmids expressing regions from the long proximal *VRK1* promoter (-1028 to + 52) cloned in pGL2-b-luciferase vector and Renilla-luciferase as internal control were transfected in HEK293T cells with different amounts of plasmid Flag-2-Sox2. **b.** Lack of Dose-dependent activation of the *VRK1* gene short promoter (-264 to + 52), cloned in pGL2-b-luciferase vector, by expression of increasing amounts of Sox2. Renilla-luciferase was used as internal control. The PGL2-Control is a plasmid expressing luciferase under the SV40 promoter used as positive control. pGL2-basic,, a promoterless plasmid, was used as negative and background control. Plasmid expression was also confirmed by immunoblot. Human β-actin was detected using a mouse monoclonal anti-β-actin antibody (Sigma-Aldrich; St. Louis, MO, USA) (1:5000). (Student's Test: \* $<0,05$ ; \*\* $<0,005$ ; \*\*\* $<0,0005$ ).

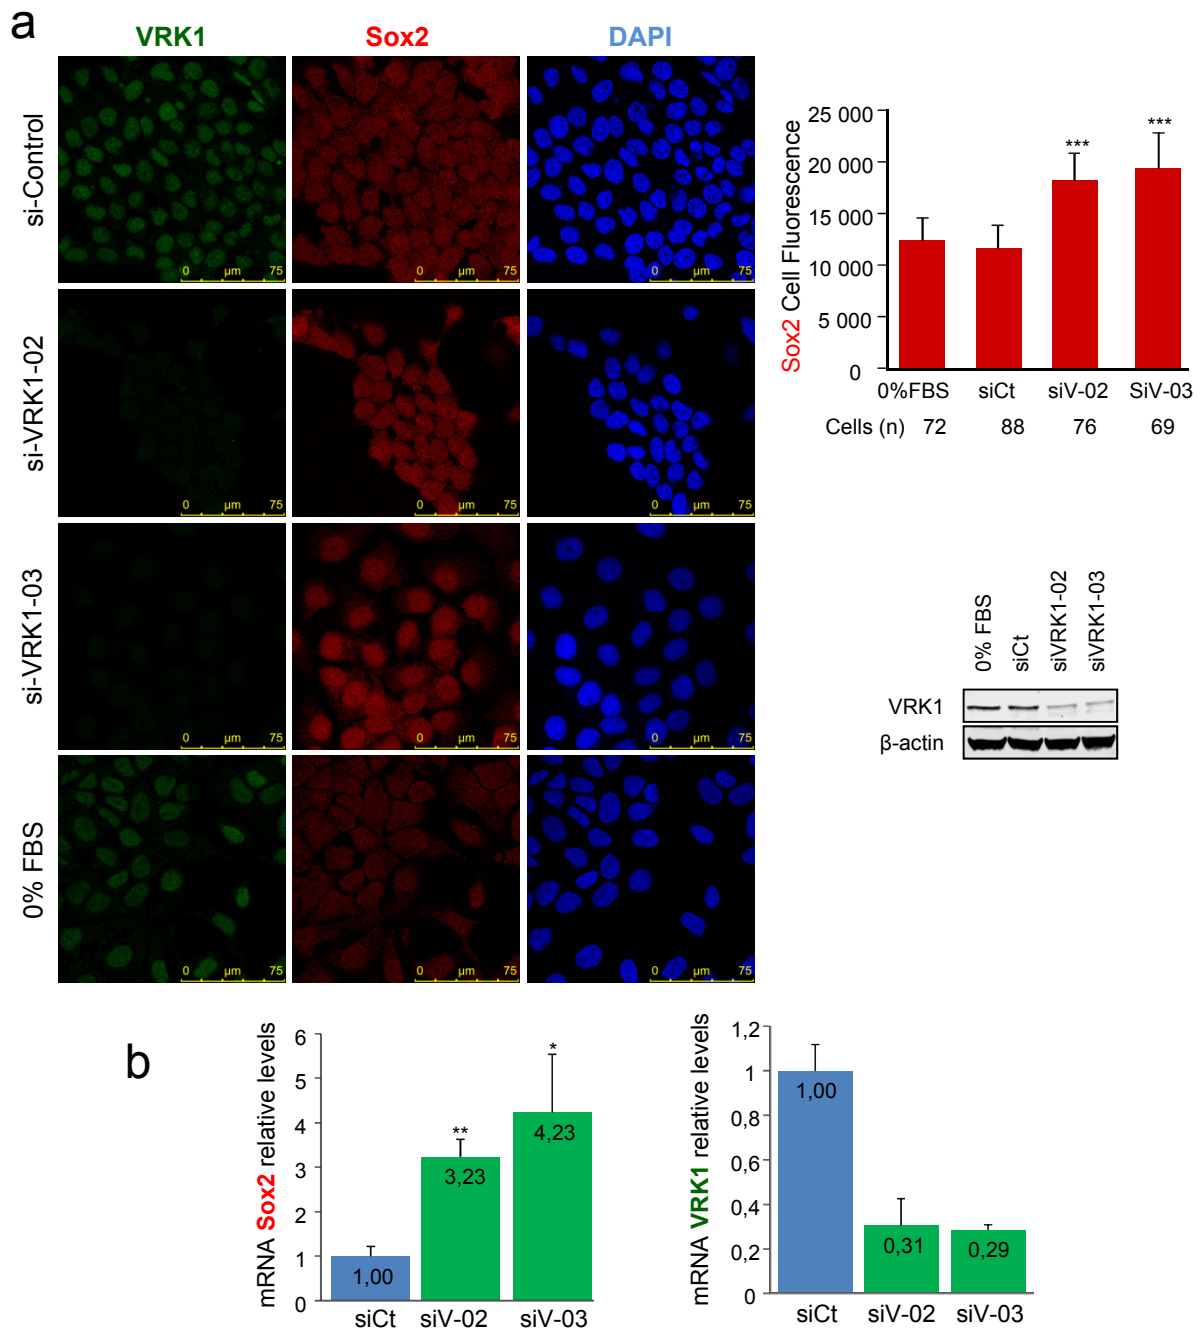

**Supplementary Figure S5. Effect of VRK1 knockdown on Sox2 in MCF-7 cells.** **a.** Sox2 protein and fluorescence levels increase when VRK1 levels decrease in MCF7 cells. In immunofluorescence, human endogenous Sox2 was detected with a mouse monoclonal anti-Sox2 (E-4). Human endogenous VRK1 was detected using a rabbit polyclonal anti-VRK1 antibody. Human endogenous VRK1 was detected, by Western Blot, using a murine mAb anti-VRK1 (1B5). Human endogenous Sox2 was detected using a goat polyclonal anti-Sox2 (Y-17). and human β-actin was detected using a mouse monoclonal anti-β-Actin antibody. **b.** Depletion of VRK1 results in an increase of Sox2 mRNA. 72 hours after siControl, si-VRK1-02 and si-VRK1-09 treatment, was performed the fixation and permeabilization of MCF-7 cells. For expression analysis, MCF-7 cells were transfected with siControl (siCt), siVRK1-02 (siV-02) or siVRK1-03 (siV-03) and 72hours later the mRNA was extracted. The qRT-PCR was performed using primers for VRK1, Sox2 and GAPDH.

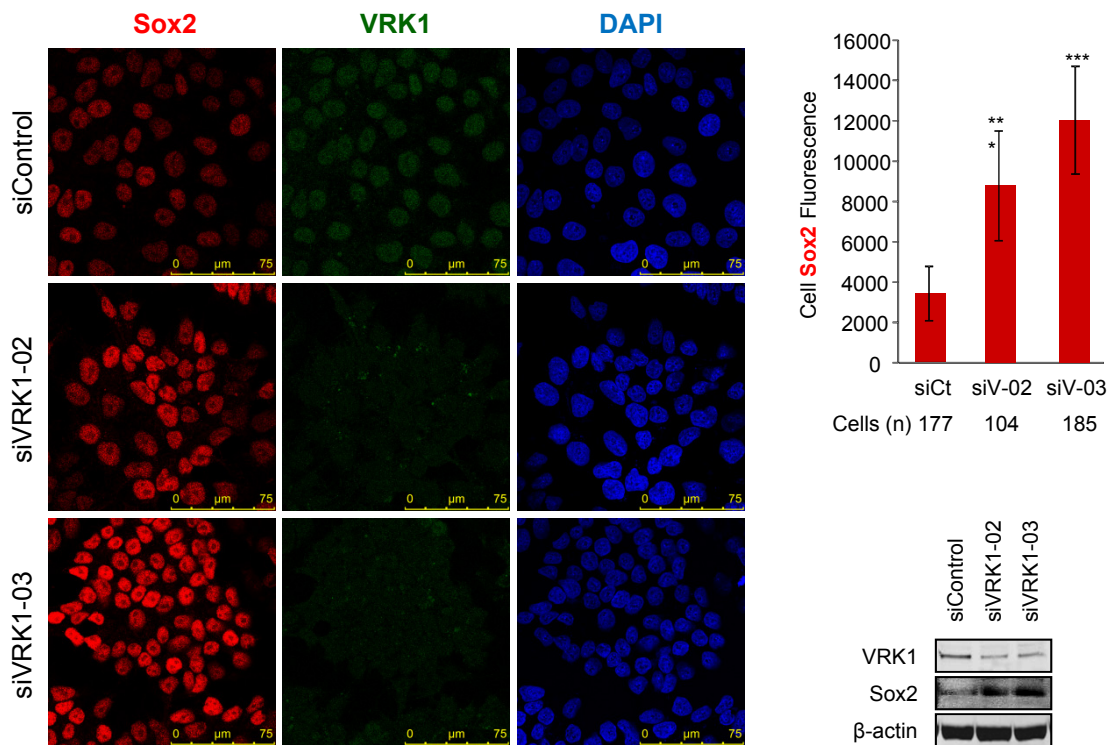

**Supplementary Figure S6 – Effect of VRK1 knockdown on the Sox2 levels in NT2 cells.** 72 hours after siControl (siCt), si-VRK1-02 (siV-02) and si-VRK1-03 (siV-03) treatment, was performed the fixation and permeabilization of Ntera-2 cells. By immunofluorescence, human endogenous Sox2 was detected with a rabbit polyclonal anti-Sox2 antibody. Human endogenous VRK1 was detected using a rabbit polyclonal anti-VRK1 antibody. DAPI (1:1000). For immunoblot analysis, cells were harvested, lysed and loaded in a 10% acrylamide gel. Human endogenous VRK1 was detected using an anti-VRK1 murine mAb (1B5) antibody. Human endogenous Sox2 was detected using a rabbit polyclonal anti-Sox2 antibody, and human β-actin was detected using a murine mAb anti-β-actin antibody.

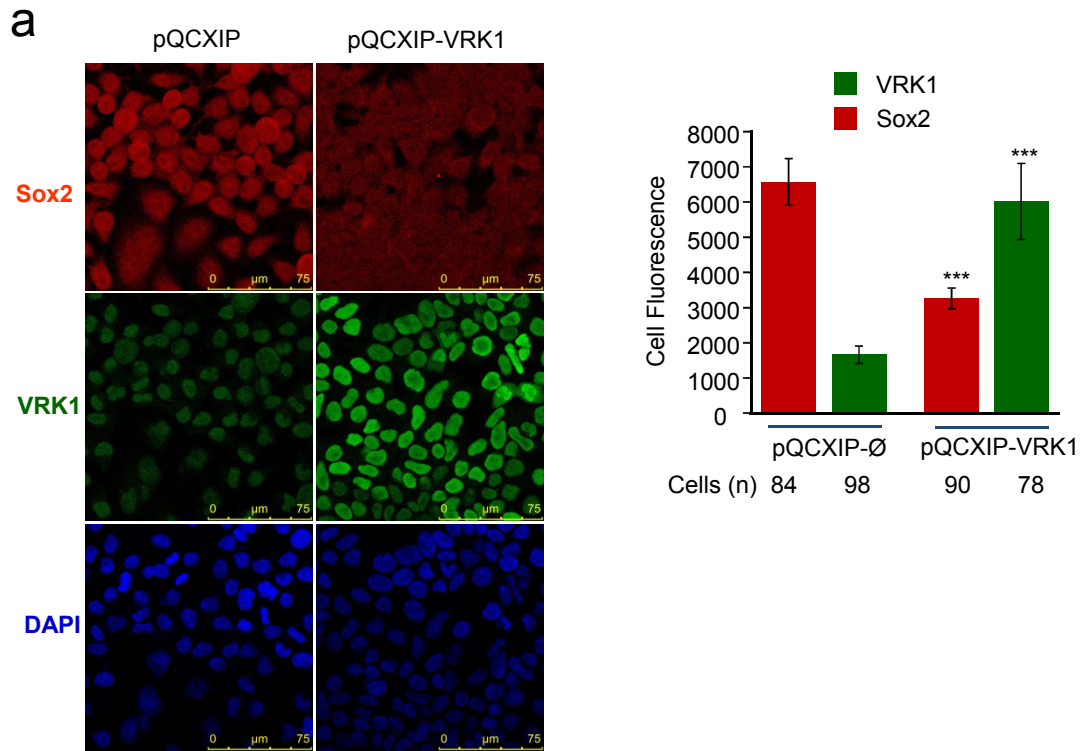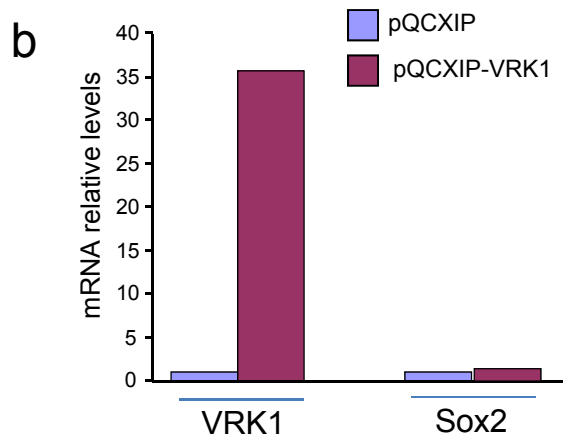

**Supplementary Figure S7. Effect of VRK1 overexpression on Sox2 gene expression in HeLa cells.** HeLa cells were infected with a retroviral plasmid (pQCXIP) or a construct expressing VRK1 (pQCXIP-VRK1). Cells were grown in the presence of puromycin and used as a pool. **a.** Detection of the nuclear levels of VRK1 and Sox2 detected by confocal immunofluorescence. To the right is shown the quantification of individual cells. **b.** Effect of VRK1 overexpression on Sox2 mRNA in a stable HeLa cells used as a pool. Total RNA was extracted from stable cell lines infected with either pQCXIP (control vector) or pQCXIP-VRK1. This RNA was used for quantification by qRT-PCR with VRK1 and Sox2 specific primers. Result is the mean of two experiments.



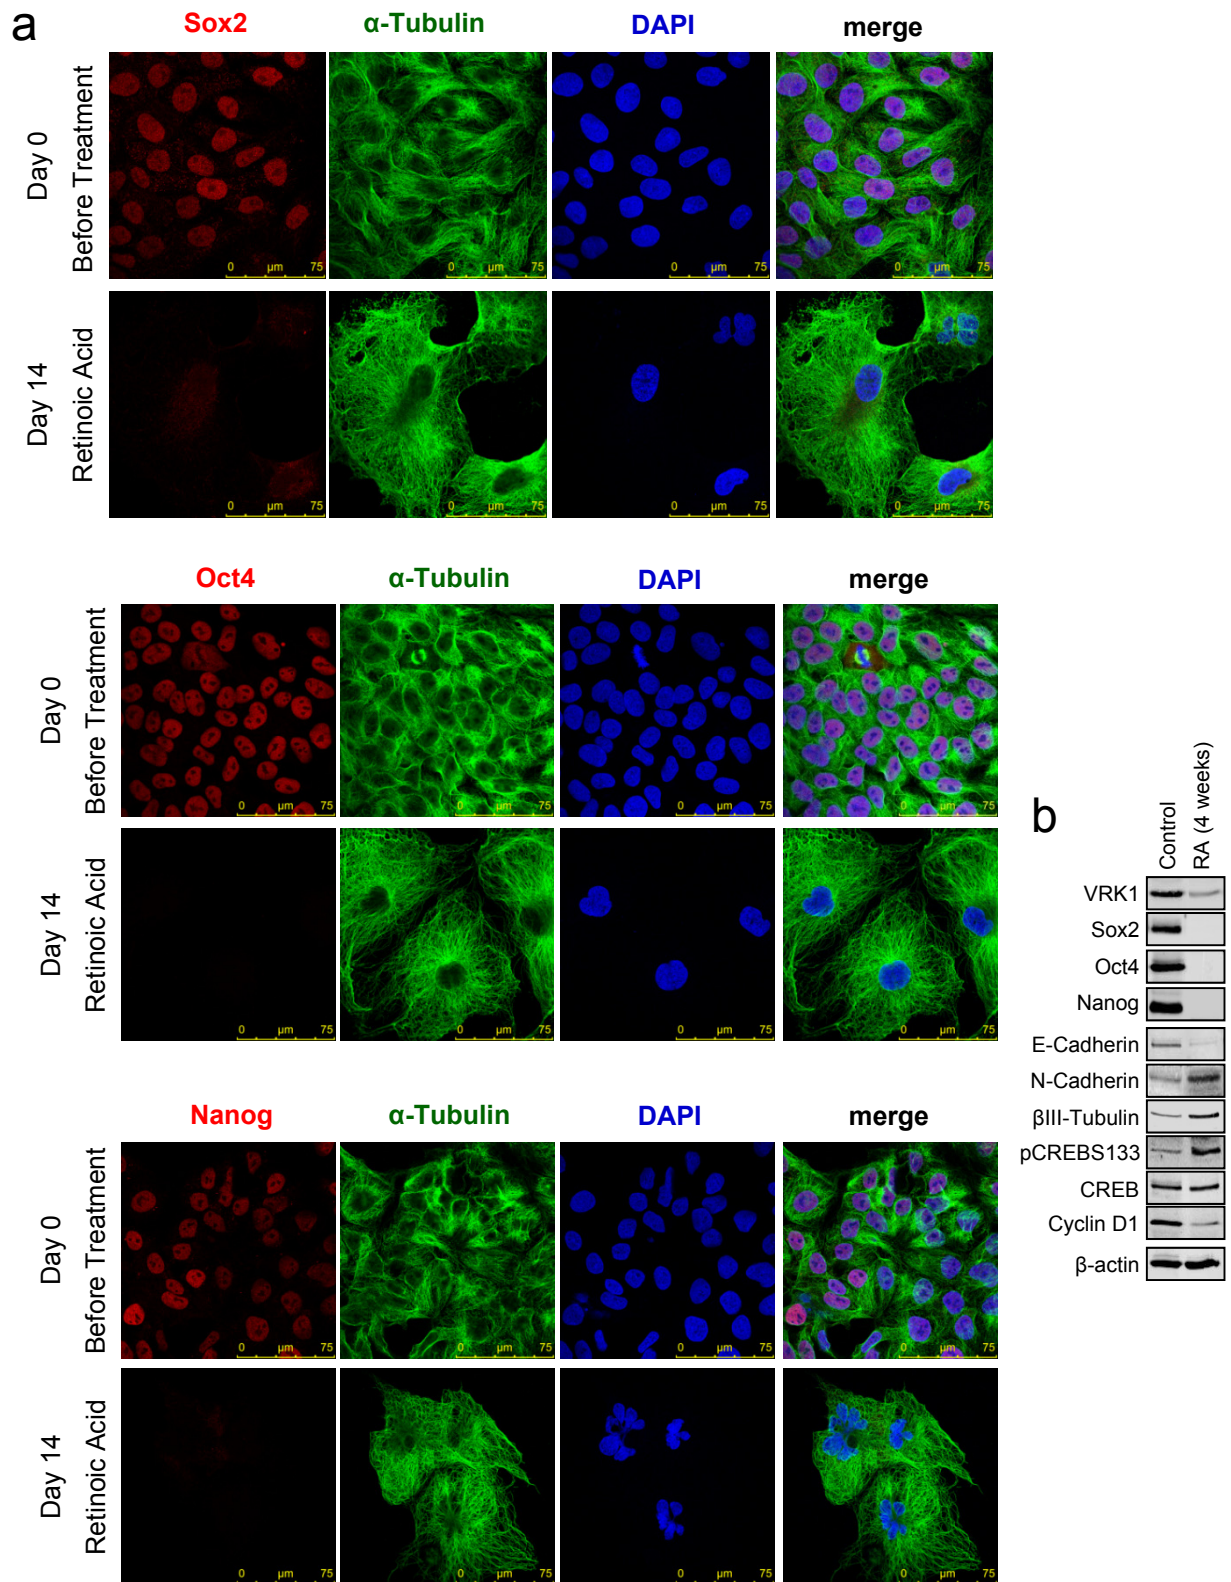

**Supplementary Figure S8. Differentiation of NT2 cells induced by retinoic acid.** **a.** Loss of expression of Sox2, Oct4 and nanog in RA differentiated NT2 cells by confocal microscopy (left column). Reorganization of  $\alpha$ -tubulin induced by retinoic acid (second column). **b.** Detection of several markers in non-treated and treated (differentiated cells).

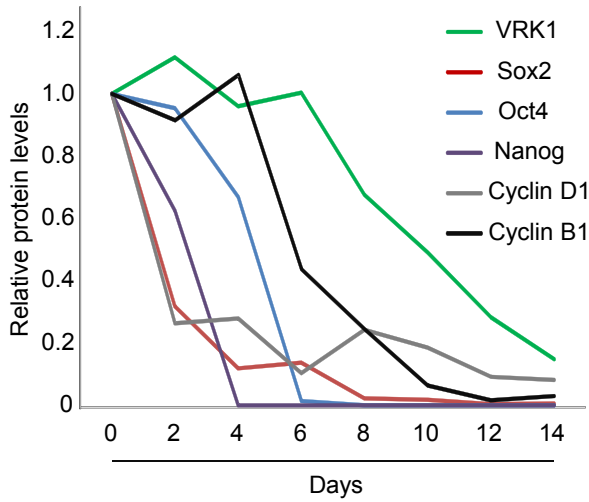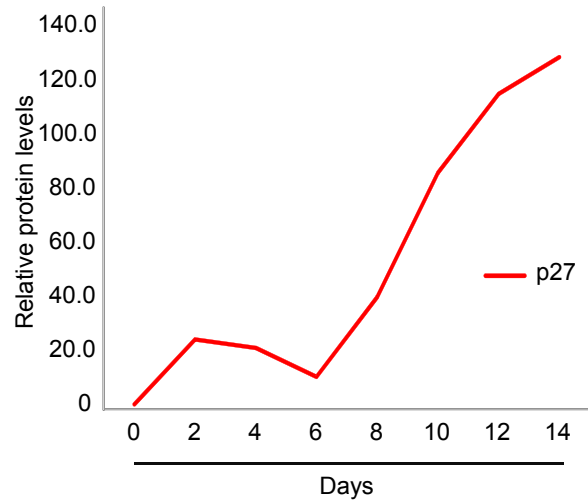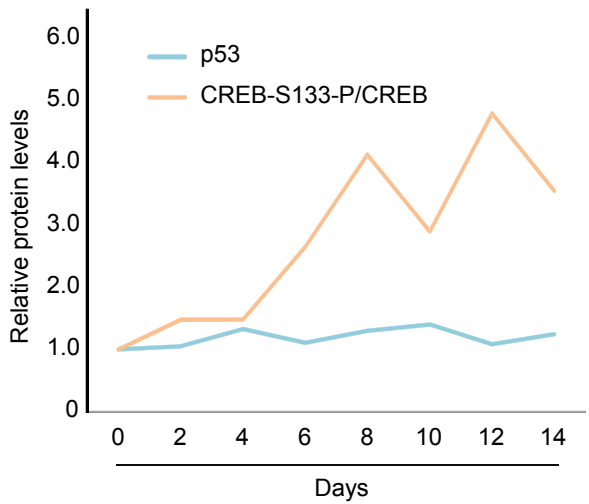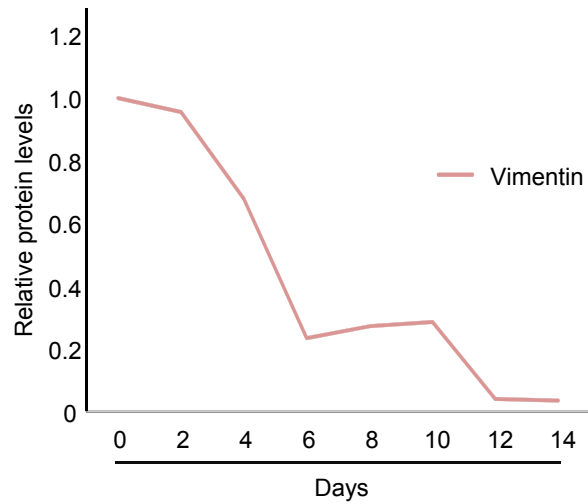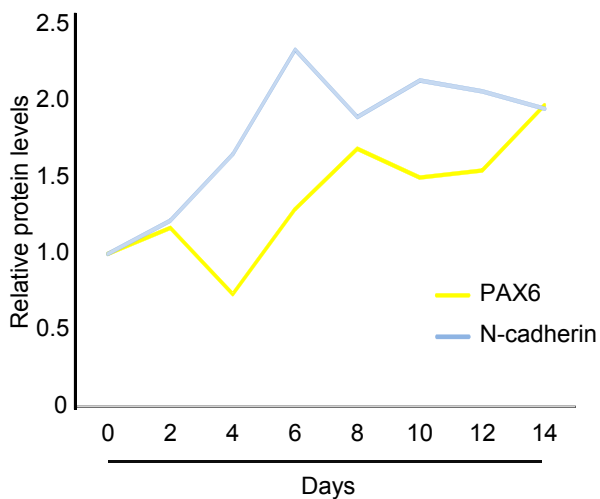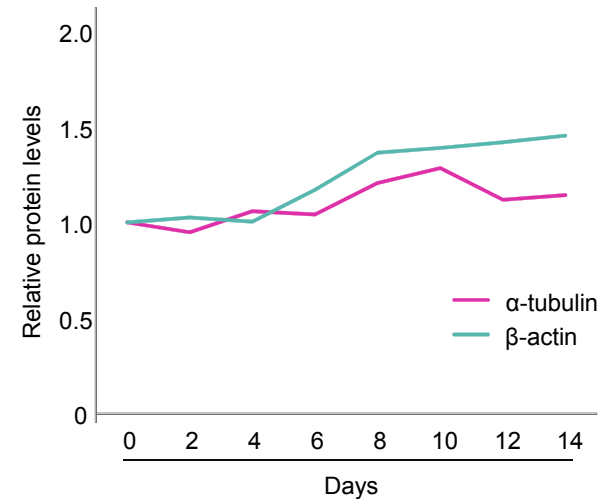

**Supplementary Figure S9.** Quantification of the immunoblots in Figure 7 showing the differentiation of NT-2 cells induced by RA.
